# Supplementary material for: The Microbiome Associated with the Reef Builder Neogoniolithon sp. in the Eastern Mediterranean
Source: MDPI journal article supplement (doi:10.3390/microorganisms9071374), 2021-06-24
Supplement: s1 [file s1]

**Figure S2**

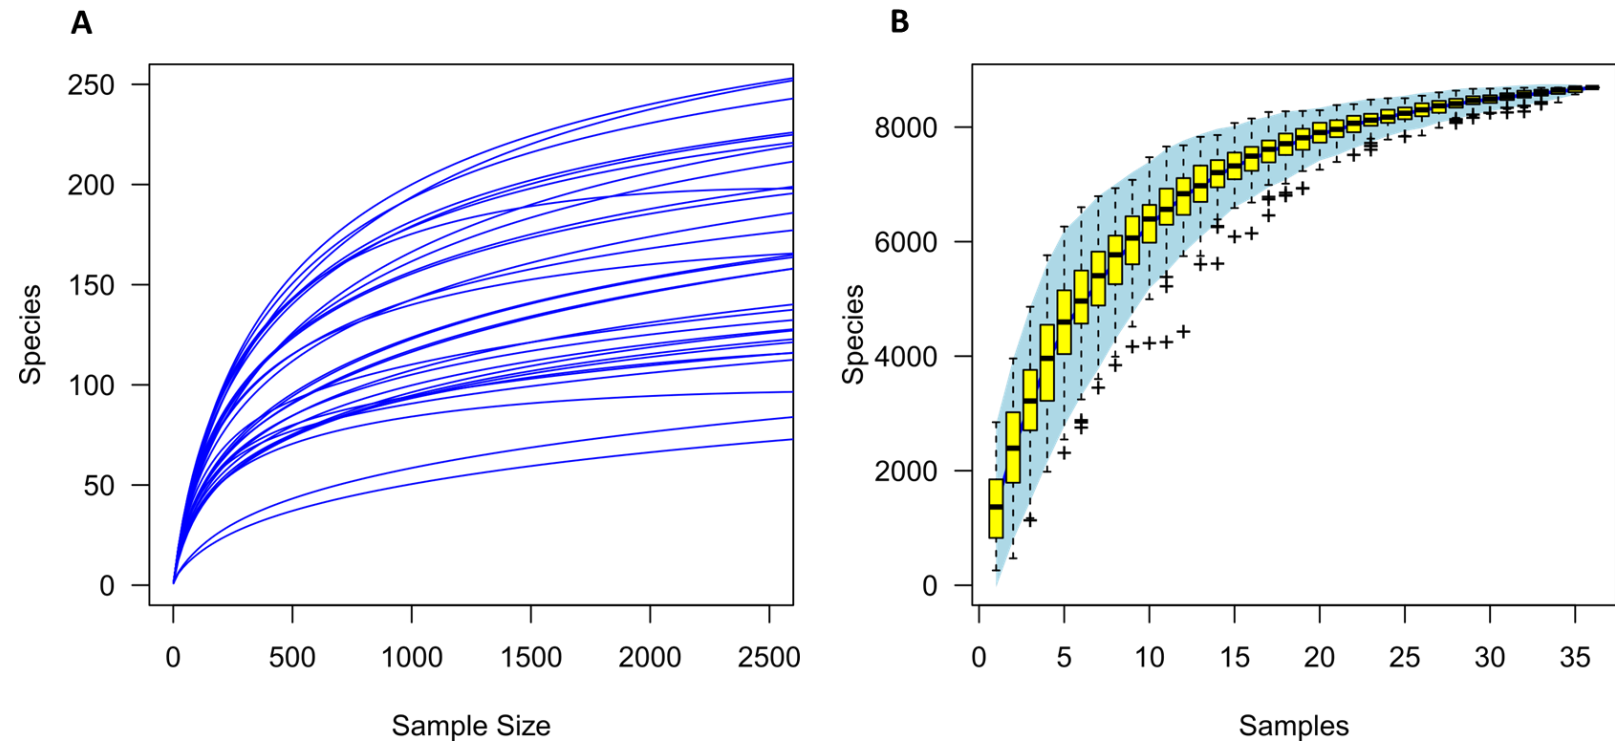

**Figure S2:** (A) Rarefaction curves. Number of species in relation to the sample size (sequencing depth; <2500 reads) reach a plateau for all samples, indicating a good representation of the most abundant taxa in the microbial community. (B) Species accumulation curve. The species accumulation in relation to the number of sequencing samples show a plateau starting from 20 samples indicating that sample replicates are enough to represent major species of the community.
