# Supplementary material for: The Microbiome Associated with the Reef Builder Neogoniolithon sp. in the Eastern Mediterranean
Source: MDPI journal article supplement (doi:10.3390/microorganisms9071374), 2021-06-24
Supplement: s1 [file s1]

Figure S5

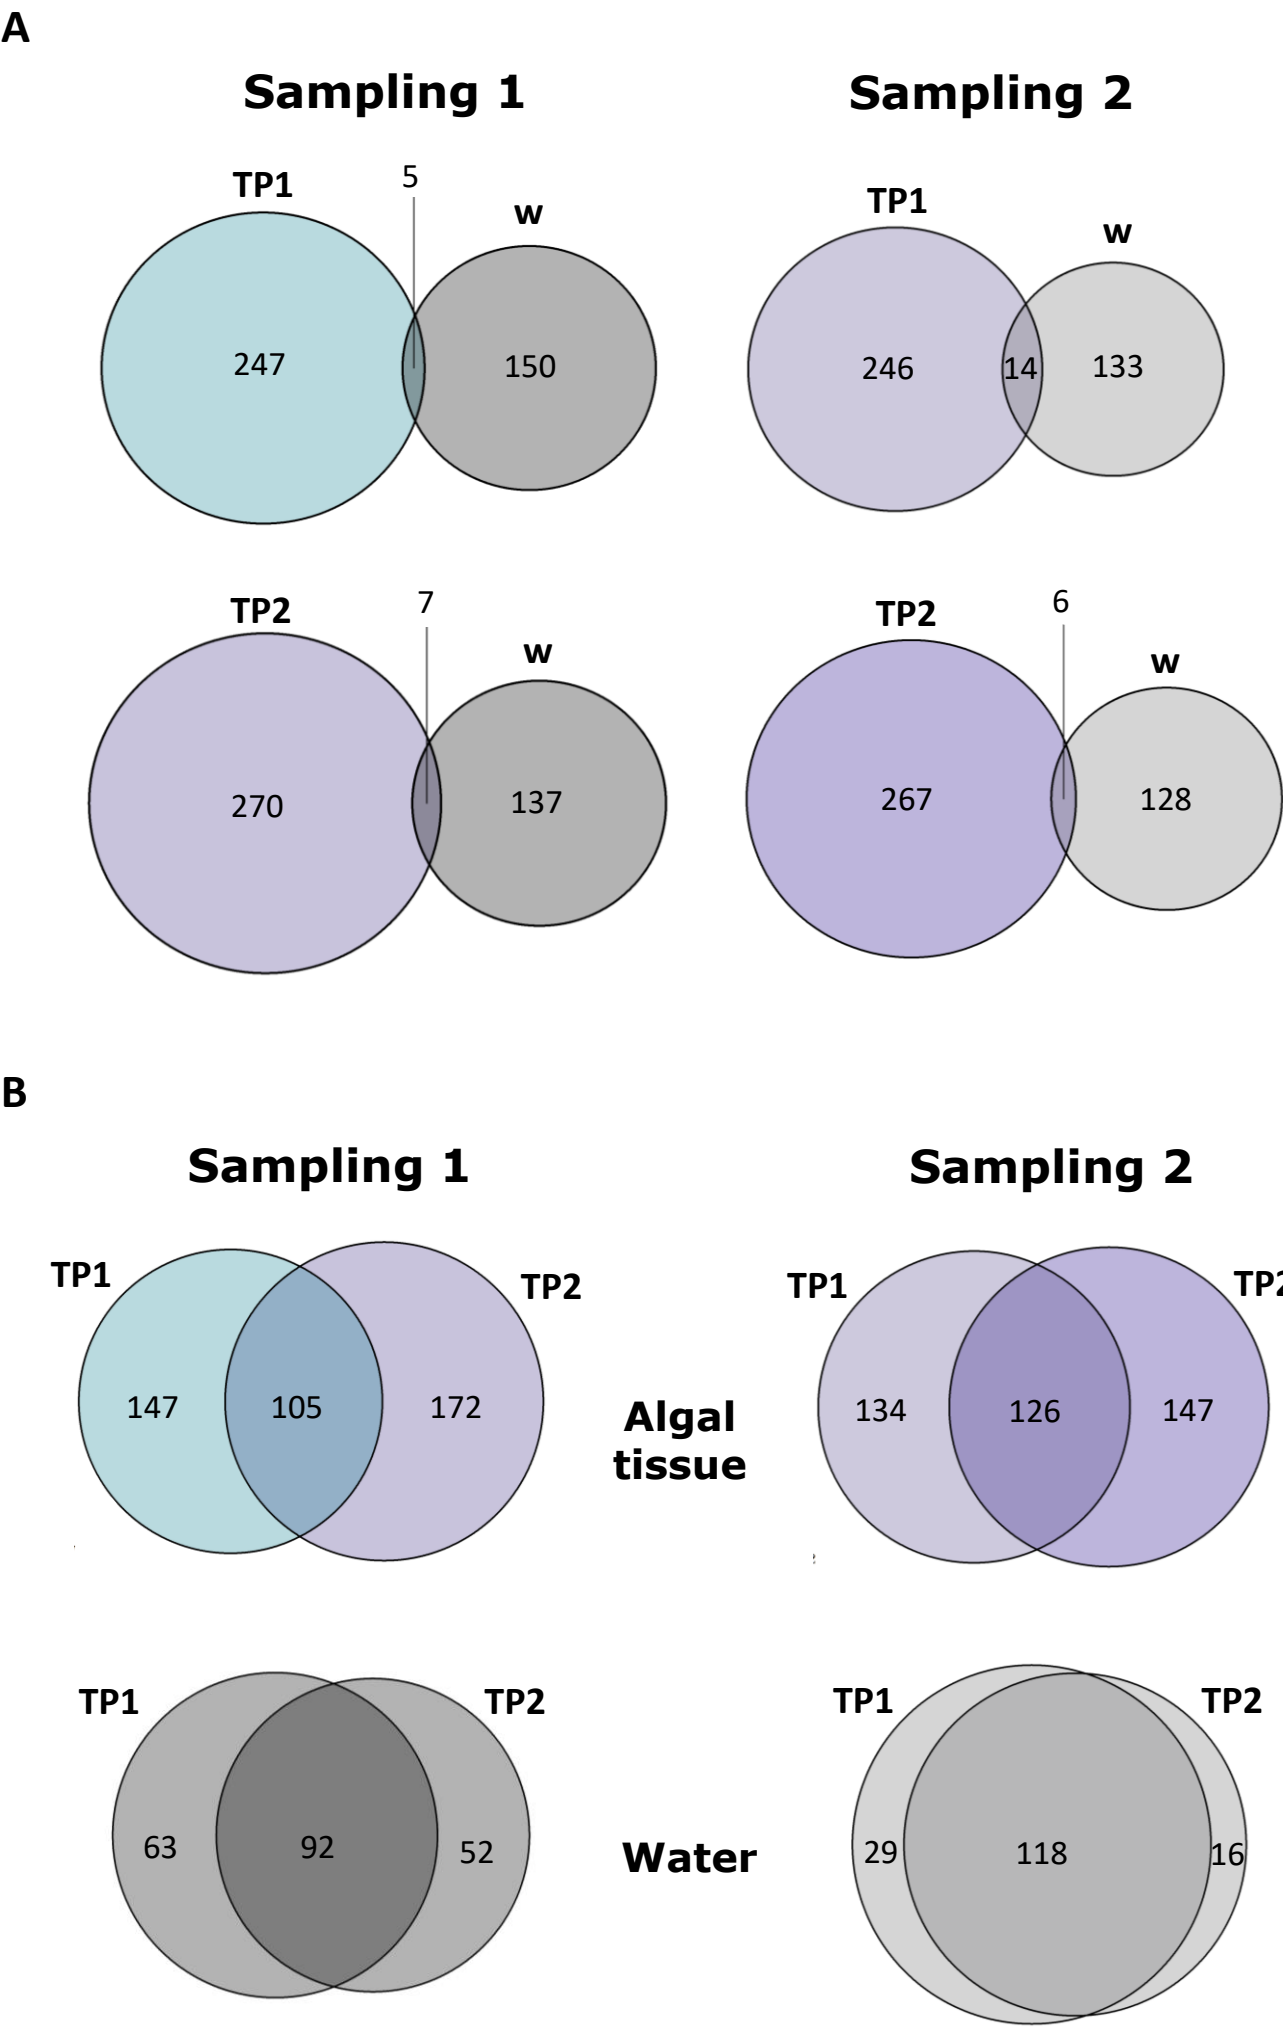

**Figure S5:** Venn diagram of shared ASVs between (A) *Neogoniolithon* sp. surfaces samples from (A) tidal pools (TP1, upper panel; TP2, lower panel) and their surrounding water, (B) algal tissue (upper panel) and their surrounding water samples (lower panel) in different tidal pools, in samplings 1 (left) and 2 (right).
