# Supplementary material for: The Microbiome Associated with the Reef Builder Neogoniolithon sp. in the Eastern Mediterranean
Source: MDPI journal article supplement (doi:10.3390/microorganisms9071374), 2021-06-24
Supplement: s1 [file s1]

Figure S4

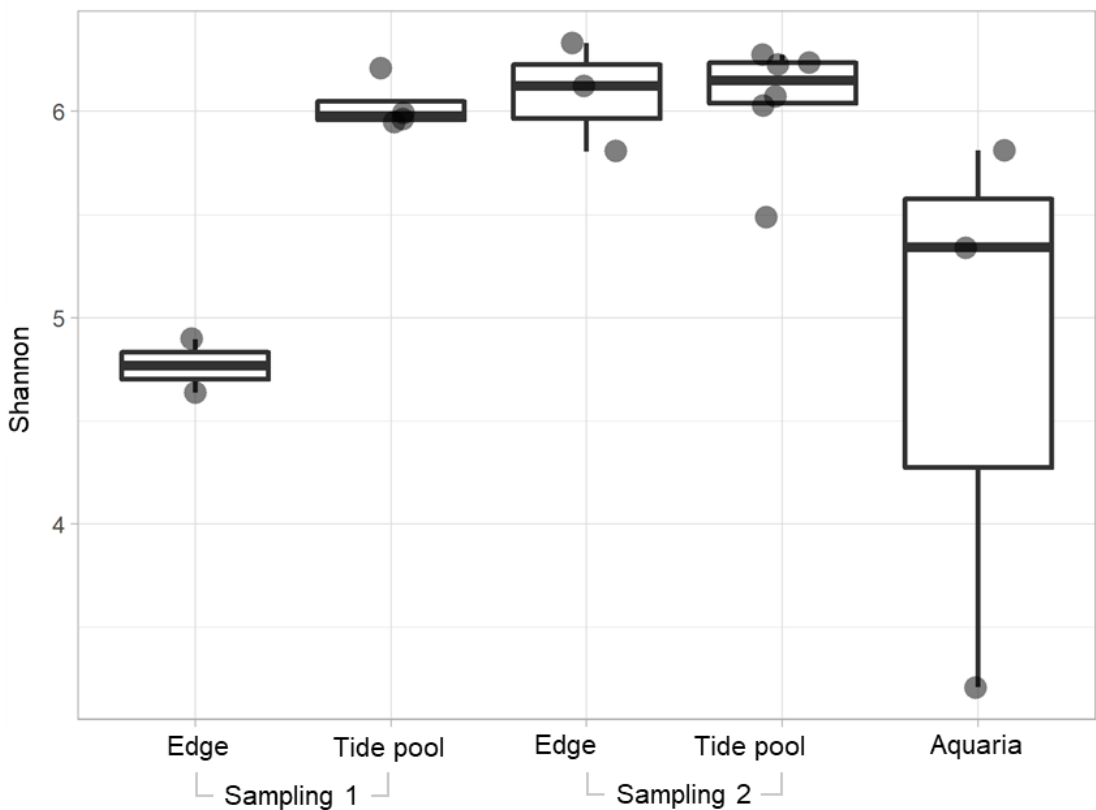

**Figure S4:** Alpha diversity analysis (calculated using Shannon index) of algal samples in tidal pools, platform edge (see Fig. 2B) and aquaria. In addition to crossings reported in Fig. 2B, significant difference was observed between aquaria and all other algal samples (P value = 0.0214).
