# Supplementary material for: The Microbiome Associated with the Reef Builder Neogoniolithon sp. in the Eastern Mediterranean
Source: MDPI journal article supplement (doi:10.3390/microorganisms9071374), 2021-06-24
Supplement: s1 [file s1]

Figure S3

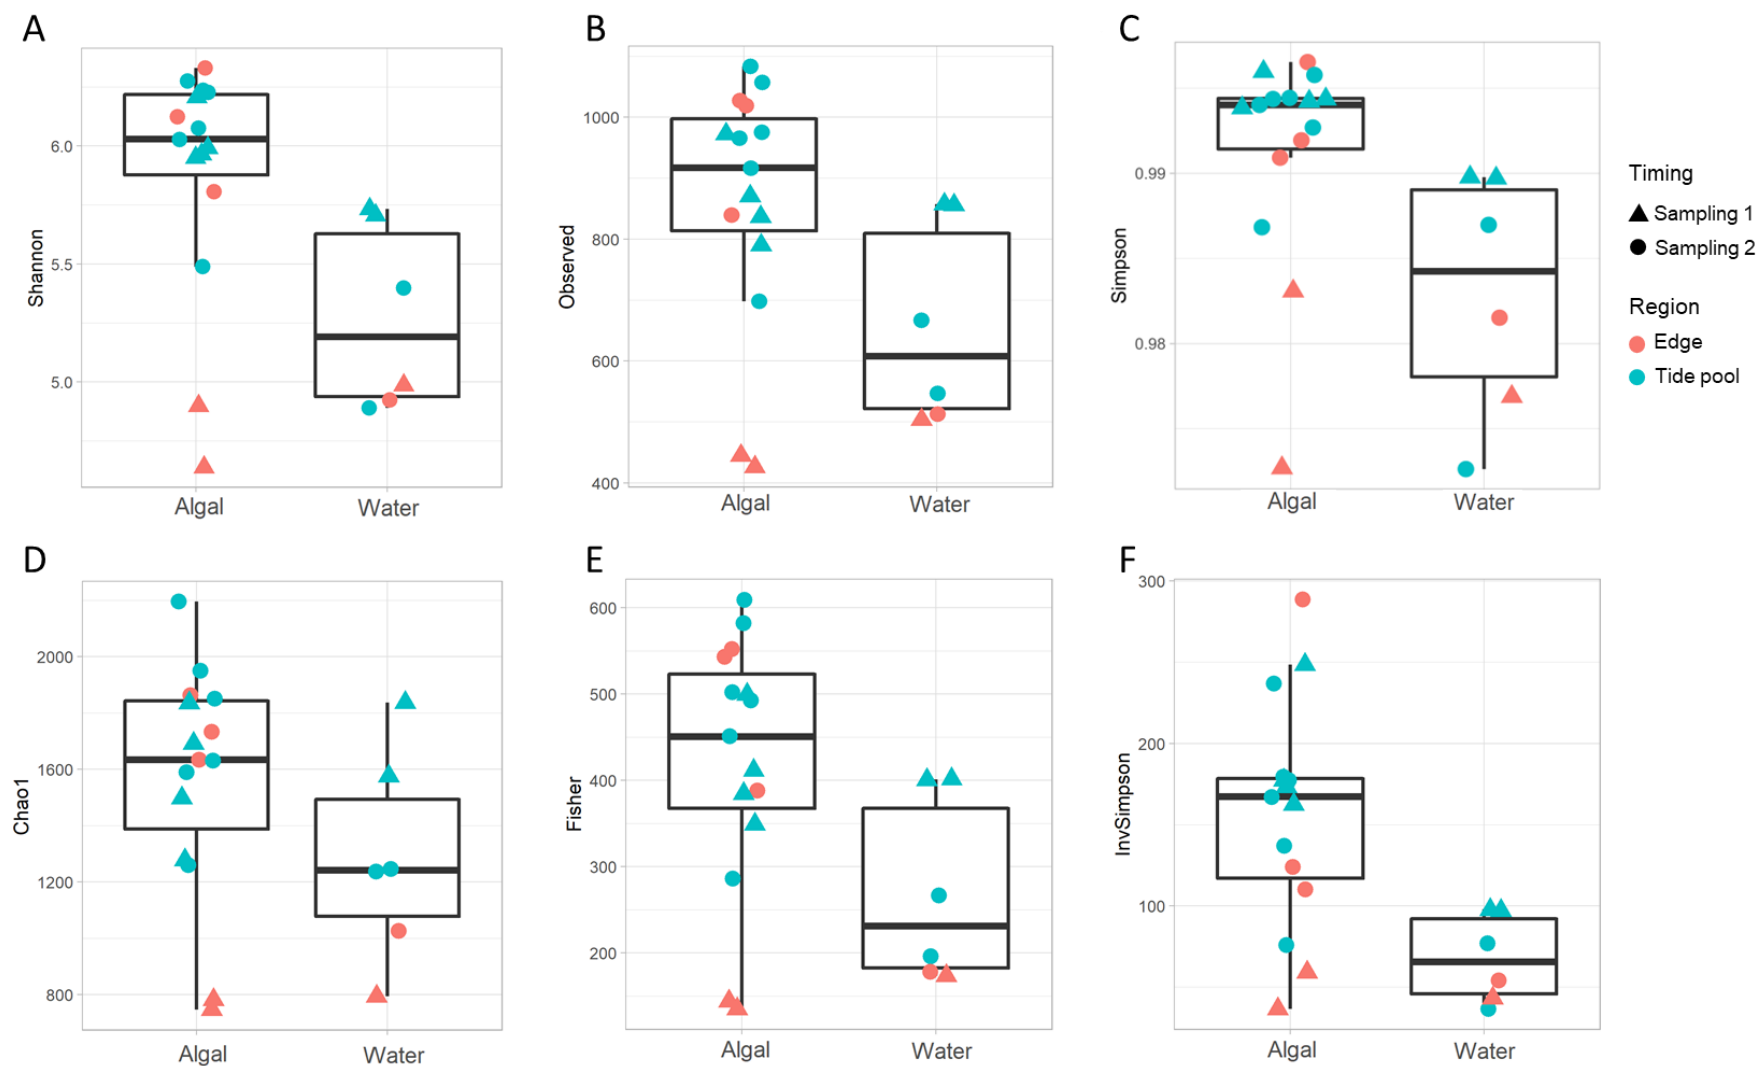

**Figure S3:** Alpha diversity analyses calculated using Shannon (A, as in Fig. 2 for comparison), Observed (B), Simpson (C), Chao1 (D), Fisher (E) and InvSimpson (F) indices for *Neogoniolithon* sp. surfaces and their surrounding water during samplings 1 (triangles) and 2 (circles), in different studying regions (Tidal pools, turquoise; platform edge, red).
