# Supplementary material for: The Microbiome Associated with the Reef Builder Neogoniolithon sp. in the Eastern Mediterranean
Source: Microorganisms. 2021 Jun 24;9(7):1374. doi: 10.3390/microorganisms9071374 (PMC8306765; doi:10.3390/microorganisms9071374)
Supplement: Supplementary file 1 [file microorganisms-09-01374-s001.zip]

Archive with 10 entries (10 files):
- SI PDFs/Figure S1.pdf
- SI PDFs/Figure S2.pdf
- SI PDFs/Figure S3.pdf
- SI PDFs/Figure S4.pdf
- SI PDFs/Figure S5.pdf
- SI PDFs/Figure S6.pdf
- SI PDFs/Legend to Supplementary Figures and Tables.pdf
- SI PDFs/Table S1 - table_sample_stats.xlsx
- SI PDFs/Table S2 - abundanceByGroup_Phylum level.xlsx
- SI PDFs/Table S3- abundanceByGroup_Class level.xlsx
