# Supplementary material for: The Microbiome Associated with the Reef Builder Neogoniolithon sp. in the Eastern Mediterranean
Source: Microorganisms. 2021 Jun 24;9(7):1374. doi: 10.3390/microorganisms9071374 (PMC8306765; doi:10.3390/microorganisms9071374)
Supplement: Supplementary file 1 [file microorganisms-09-01374-s001.zip › SI PDFs/Table S1 - table_sample_stats.xlsx]

## Sheet: table_sample_stats
Table S1: DADA2 read count statistics during different levels of processing including sample classification.
#DADA2 statistics
input	filtered	denoisedF	denoisedR	merged	nonchim	SampleID	SampleName	Timing	Tissue_water	Location	final / raw
44133	31957	30123	28465	23115	22876	W2_S11	S1_TP2w	Sampling 1	Water	Tidepool	0.518342
47933	47707	46172	46496	41662	41197	W2_S13	S1_TP2w	Sampling 1	Water	Tidepool	0.859471
7320	4949	4236	3957	3213	3200	TP2b_S17	S1_TP2b	Sampling 1	Algal	Tidepool	0.437158
12758	12514	12057	12109	11010	10953	TP2b_S19	S1_TP2b	Sampling 1	Algal	Tidepool	0.85852
8777	5986	5494	5105	4092	4060	TP2a_S16	S1_TP2a	Sampling 1	Algal	Tidepool	0.462573
23940	23700	23097	23171	21415	21235	TP2a_S18	S1_TP2a	Sampling 1	Algal	Tidepool	0.887009
39049	28059	25987	24742	19684	19538	W1_S10	S1_TP1w	Sampling 1	Algal	Tidepool	0.500346
38297	38064	36626	36928	32443	32141	W1_S11	S1_TP1w	Sampling 1	Algal	Tidepool	0.839256
52174	37113	35511	33531	28331	28204	TP1b_S15	S1_TP1b	Sampling 1	Algal	Tidepool	0.540576
52619	52385	51538	51605	48647	48464	TP1b_S17	S1_TP1b	Sampling 1	Algal	Tidepool	0.921036
8145	5573	4913	4585	3740	3720	TP1a_S14	S1_TP1a	Sampling 1	Algal	Tidepool	0.456722
7040	6880	6655	6656	6022	5997	TP1a_S16	S1_TP1a	Sampling 1	Algal	Tidepool	0.851847
7880	5540	4874	4609	3942	3883	WE_S13	S1_Ew	Sampling 1	Water	Edge	0.492766
6458	6370	6150	6139	5709	5622	WE_S15	S1_Ew	Sampling 1	Water	Edge	0.870548
47940	47696	47163	47119	45402	41917	E2_S10	S1_E2	Sampling 1	Algal	Edge	0.874364
49841	36798	34985	33203	29277	26544	E2_S9	S1_E2	Sampling 1	Algal	Edge	0.532574
7304	4780	4061	3774	3071	3065	E1_S8	S1_E1	Sampling 1	Algal	Edge	0.419633
10301	10137	9829	9815	9272	9256	E1_S9	S1_E1	Sampling 1	Algal	Edge	0.898554
69179	69160	68239	68392	64910	63878	W2_SG_S13	S2_TP2w	Sampling 2	Water	Tidepool	0.923373
70391	70366	69634	69654	67391	66930	TP2c_S_S11	S2_TP2c	Sampling 2	Algal	Tidepool	0.950832
77485	77437	76115	76312	71933	71328	TP2b_S_S9	S2_TP2b	Sampling 2	Algal	Tidepool	0.920539
54709	54683	53139	53449	48463	47785	TP2a_S_S8	S2_TP2a	Sampling 2	Algal	Tidepool	0.873439
51456	51434	50478	50637	47877	46922	W1_SG_S12	S2_TP1w	Sampling 2	Water	Tidepool	0.911886
63598	63501	62163	62308	57512	57147	TP1b_S_S7	S2_TP1b	Sampling 2	Algal	Tidepool	0.898566
56951	56925	55851	55896	51944	51354	TP1c_S_S10	S2_TP1c	Sampling 2	Algal	Tidepool	0.901723
78000	77975	76801	77191	71956	71208	TP1a_S_S6	S2_E3	Sampling 2	Algal	Edge	0.912923
44684	44666	43950	44030	41707	41053	W3_SG_S14	S2_Ew	Sampling 2	Water	Edge	0.91874
41127	41098	40142	40145	37277	37073	E3_SG_S17	S2_TP1a	Sampling 2	Algal	Tidepool	0.901427
49016	48945	48073	48074	44474	44203	E2_SG_S16	S2_E2	Sampling 2	Algal	Edge	0.901808
78137	78085	77066	77224	73646	73256	E1_SG_S15	S2_E1	Sampling 2	Algal	Edge	0.937533
1599	762	170	116	70	70	WA3_S12	n_Aw	no	Water	Aquarium	0.0437774
693	505	253	226	169	168	WA3_S14	n_Aw	no	Water	Aquarium	0.242424
61050	45891	44162	42926	38124	37503	A3_S7	n_A3	no	Algal	Aquarium	0.6143
61828	61617	60713	59823	56315	56033	A3_S8	n_A3	no	Algal	Aquarium	0.906272
45149	33375	30905	30951	16451	16089	A2_S6	n_A2	no	Algal	Aquarium	0.356353
44180	44045	31267	41486	23823	23689	A2_S7	n_A2	no	Algal	Aquarium	0.536193
93770	68385	65107	61804	49474	48150	A1_S5	n_A1	no	Algal	Aquarium	0.51349
93875	93519	85975	81833	68997	68663	A1_S6	n_A1	no	Algal	Aquarium	0.73143
