# Supplementary material for: The Microbiome Associated with the Reef Builder Neogoniolithon sp. in the Eastern Mediterranean
Source: Microorganisms. 2021 Jun 24;9(7):1374. doi: 10.3390/microorganisms9071374 (PMC8306765; doi:10.3390/microorganisms9071374)
Supplement: Supplementary file 1 [file microorganisms-09-01374-s001.zip › SI PDFs/Table S2 - abundanceByGroup_Phylum level.xlsx]

## Sheet: core community
Table S2: Abundance of various bacterial phyla associated with Neogoniolithon sp. surfaces. S1 = sampling 1, S2 = sampling 2, TP (1 and 2) = tidal pools, E = platform edge, w = water sample, a, b and c = biological replicates.
Phylum	S1_TP1a	S1_TP1b	S1_TP2a	S1_TP2b	S2_TP1a	S2_TP1b	S2_TP1c	S2_TP2a	S2_TP2b	S2_TP2c	S1_E1	S1_E2	S2_E1	S2_E2	S2_E3	Average	STDVE	Average	STDVE
Proteobacteria	0.53972	0.54209	0.67743	0.56452	0.36129	0.43613	0.37878	0.30643	0.50644	0.35209	0.70891	0.41271	0.50233	0.51222	0.56252	0.490907	0.116644	49.0907	11.6644
Bacteroidota	0.2469	0.23807	0.12277	0.23037	0.417	0.20971	0.18751	0.24398	0.18072	0.51827	0.18412	0.50934	0.16376	0.20622	0.12386	0.252173	0.126417	25.2173	12.6417
Cyanobacteria	0.01876	0.01232	0.03015	0.02061	0.10662	0.07895	0.05029	0.01354	0.13015	0.05659	0.04736	0.01175	0.05556	0.11094	0.05614	0.0533153	0.0383422	5.33153	3.83422
Actinobacteriota	0.07884	0.04577	0.03109	0.06054	0.03613	0.04822	0.06929	0.02329	0.08038	0.00593	0.02388	0.00408	0.07625	0.05156	0.07508	0.0473553	0.0260096	4.73553	2.60096
Firmicutes	0.00498	0	0	0	0	0.11902	0.20063	0.08314	0.0023	0.00149	0	0	0	0	0.04913	0.0307127	0.0595384	3.07127	5.95384
Planctomycetota	0.00628	0.00575	0.02075	0.00849	0.03044	0.02049	0.02346	0.18179	0.02923	0.00817	0.00821	0	0.01624	0.02159	0.00738	0.0258847	0.044112	2.58847	4.4112
Dadabacteria	0.01494	0.03193	0.02403	0.02407	0	0.01444	0.01736	0.04364	0.0124	0	0.00321	0	0.03076	0.01976	0.00472	0.016084	0.0132461	1.6084	1.32461
Verrucomicrobiota	0.00362	0.0019	0.0216	0	0.00962	0.00776	0.0149	0.04447	0	0.02557	0.00596	0.0302	0.00295	0.00291	0.02168	0.012876	0.0131945	1.2876	1.31945
Chloroflexi	0.04434	0.04048	0.00734	0.00226	0.01234	0	0	0	0.01765	0	0.00156	0.01452	0.02284	0.00645	0.01009	0.0119913	0.0142651	1.19913	1.42651
Myxococcota	0.00824	0.01966	0.01501	0.0236	0.0083	0.00463	0	0.00992	0.01198	0.00499	0	0	0.02195	0.03291	0.01582	0.0118007	0.00971058	1.18007	0.971058
Halobacterota	0	0	0	0	0	0.01914	0.01112	0.02617	0.00821	0.00352	0	0	0.01854	0	0.02931	0.007734	0.0105568	0.7734	1.05568
Deinococcota	0.00408	0.02081	0.02354	0.02189	0.00548	0.0044	0	0	0	0.00582	0.00473	0.0021	0.02106	0	0	0.007594	0.00914777	0.7594	0.914777
Euryarchaeota	0	0	0	0	0	0.01182	0.0392	0.00991	0	0.00154	0	0	0.0037	0	0.01582	0.005466	0.0106662	0.5466	1.06662
Crenarchaeota	0.01015	0.00925	0.00739	0.00573	0.00184	0.01117	0.0075	0.00312	0.00394	0	0	0	0	0.00678	0.00638	0.00488333	0.00391573	0.488333	0.391573
NB1-j	0.00487	0.01537	0	0.00951	0	0	0	0.00819	0.00275	0.00149	0	0	0.00615	0.00362	0.00481	0.003784	0.00452403	0.3784	0.452403
Patescibacteria	0.0021	0	0.00406	0.00931	0.00852	0	0	0	0	0.00546	0.00157	0.00949	0	0	0.00166	0.00281133	0.00365179	0.281133	0.365179
Acidobacteriota	0.0036	0.00534	0.00391	0.00589	0	0	0	0	0.01191	0	0.00175	0	0.00699	0.00179	0	0.00274533	0.00353935	0.274533	0.353935
Gemmatimonadota	0.00166	0	0.00516	0.00674	0	0.0019	0	0	0	0	0	0	0	0	0.00218	0.001176	0.00211164	0.1176	0.211164
Bdellovibrionota	0	0	0	0	0	0	0	0.00232	0.00197	0	0	0.00325	0.00632	0	0	0.000924	0.0018315	0.0924	0.18315
Desulfobacterota	0	0	0	0	0	0.00213	0	0	0	0	0	0	0	0.00562	0	0.000516667	0.00151462	0.0516667	0.151462
Sva0485	0	0	0	0	0	0.00377	0	0	0	0	0	0	0	0	0	0.000251333	0.00097341	0.0251333	0.097341
Calditrichota	0	0	0	0	0	0	0	0	0	0	0	0	0.00368	0	0	0.000245333	0.000950172	0.0245333	0.0950172
Dependentiae	0	0	0	0	0	0	0	0	0	0	0	0	0	0	0.00301	0.000200667	0.000777179	0.0200667	0.0777179
Fusobacteriota	0	0	0	0	0	0	0	0	0	0	0	0.0026	0	0	0	0.000173333	0.000671317	0.0173333	0.0671317
Elusimicrobiota	0	0	0	0	0	0.00198	0	0	0	0	0	0	0	0	0	0.000132	0.000511234	0.0132	0.0511234
Latescibacterota	0	0.00183	0	0	0	0	0	0	0	0	0	0	0	0	0	0.000122	0.000472504	0.0122	0.0472504
Marinimicrobia_(SAR406_clade)	0	0	0	0	0	0	0	0	0	0	0	0	0	0	0	0	0	0	0
MBNT15	0	0	0	0	0	0	0	0	0	0	0	0	0	0	0	0	0	0	0
Nanoarchaeota	0	0	0	0	0	0	0	0	0	0	0	0	0	0	0	0	0	0	0
SAR324_clade(Marine_group_B)	0	0	0	0	0	0	0	0	0	0	0	0	0	0	0	0	0	0	0
Sumerlaeota	0	0	0	0	0	0	0	0	0	0	0	0	0	0	0	0	0	0	0
Thermoplasmatota	0	0	0	0	0	0	0	0	0	0	0	0	0	0	0	0	0	0	0
