# Supplementary material for: The Microbiome Associated with the Reef Builder Neogoniolithon sp. in the Eastern Mediterranean
Source: Microorganisms. 2021 Jun 24;9(7):1374. doi: 10.3390/microorganisms9071374 (PMC8306765; doi:10.3390/microorganisms9071374)
Supplement: Supplementary file 1 [file microorganisms-09-01374-s001.zip › SI PDFs/Table S3- abundanceByGroup_Class level.xlsx]

## Sheet: Sheet1
Table S3: Abundance of various bacterial classes belonging to the four main phyla shown in Table S2. S1 = sampling 1, S2 = sampling 2, TP (1 and 2) = tidal pools, E = platform edge, w = water sample, a, b and c = biological replicates.
Class	S1_TP1a	S1_TP1b	S1_TP2a	S1_TP2b	S2_TP1a	S2_TP1b	S2_TP1c	S2_TP2a	S2_TP2b	S2_TP2c	S1_E1	S1_E2	S2_E1	S2_E2	S2_E3	Average	STDEV	Average	STDEV
Alphaproteobacteria	0.33047	0.30954	0.56425	0.45148	0.29841	0.3433	0.32864	0.21344	0.40397	0.25361	0.59771	0.23989	0.26281	0.34138	0.34371	0.352174	0.11128	35.2174	11.128
Bacteroidia	0.24276	0.2365	0.12277	0.23037	0.417	0.20971	0.18575	0.24398	0.17818	0.51827	0.18412	0.50934	0.16376	0.20622	0.12386	0.251506	0.126615	25.1506	12.6615
Gammaproteobacteria	0.20925	0.23255	0.11318	0.11304	0.06288	0.09283	0.05014	0.09299	0.10247	0.09848	0.1112	0.17164	0.23952	0.17084	0.21881	0.138655	0.0628301	13.8655	6.28301
Cyanobacteriia	0.01876	0.01232	0.03015	0.02061	0.10435	0.07895	0.05029	0.01354	0.13015	0.05659	0.04736	0.01175	0.05556	0.11094	0.05614	0.053164	0.0381206	5.3164	3.81206
Acidimicrobiia	0.05674	0.04577	0.02272	0.05228	0.03613	0.03688	0.0371	0.00806	0.0751	0.00593	0.01861	0.00225	0.06663	0.04515	0.06739	0.0384493	0.0232093	3.84493	2.32093
Thermoleophilia	0.01752	0	0.00551	0.0028	0	0.00231	0.00295	0.0065	0.00528	0	0.00298	0	0.00962	0.00641	0.00205	0.004262	0.00465651	0.4262	0.465651
Actinobacteria	0.00458	0	0.00286	0.00546	0	0.00668	0.01142	0.00675	0	0	0.00229	0.00183	0	0	0.00385	0.003048	0.00341875	0.3048	0.341875
Coriobacteriia	0	0	0	0	0	0.00235	0.01782	0.00198	0	0	0	0	0	0	0.00179	0.001596	0.00456689	0.1596	0.456689
Rhodothermia	0.00414	0.00157	0	0	0	0	0.00176	0	0.00254	0	0	0	0	0	0	0.000667333	0.00126699	0.0667333	0.126699
Vampirovibrionia	0	0	0	0	0.00227	0	0	0	0	0	0	0	0	0	0	0.000151333	0.000586111	0.0151333	0.0586111
